# Supplementary material for: Discovery of an Antarctic Ascidian-Associated Uncultivated Verrucomicrobia with Antimelanoma Palmerolide Biosynthetic Potential
Source: PubMed Central journal article supplement (PMC8636102; doi:10.1128/msphere.00759-21), 2021-12-01
Supplement: msphere.00759-21-sf002.pdf [file msphere.00759-21-sf002.pdf]

A

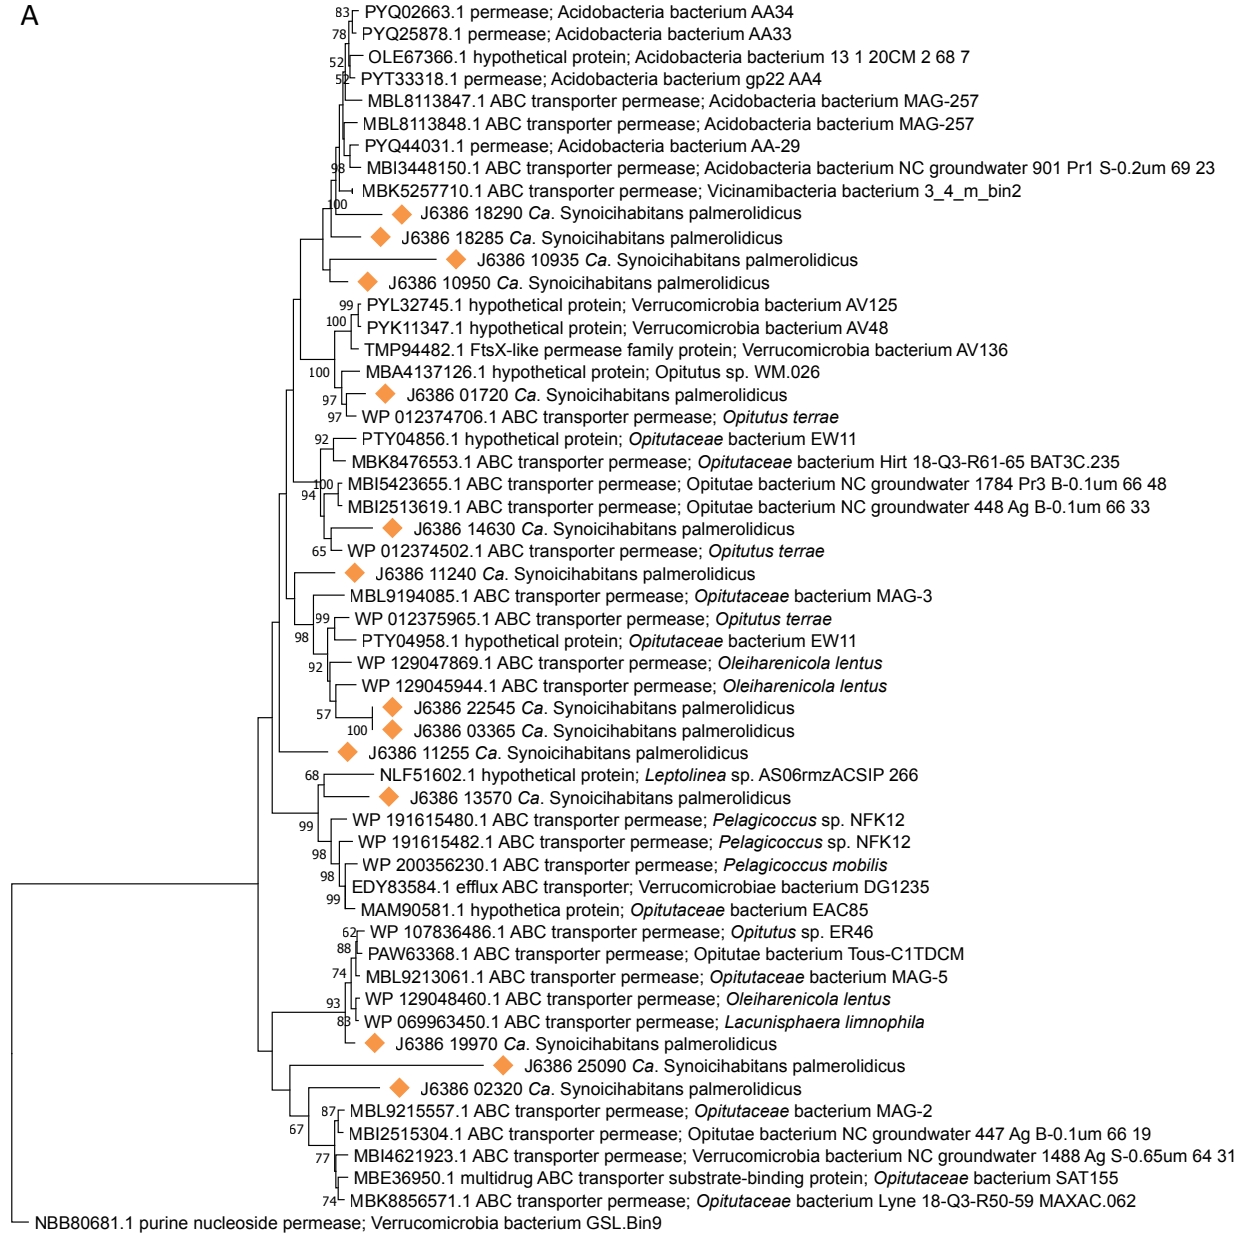

B

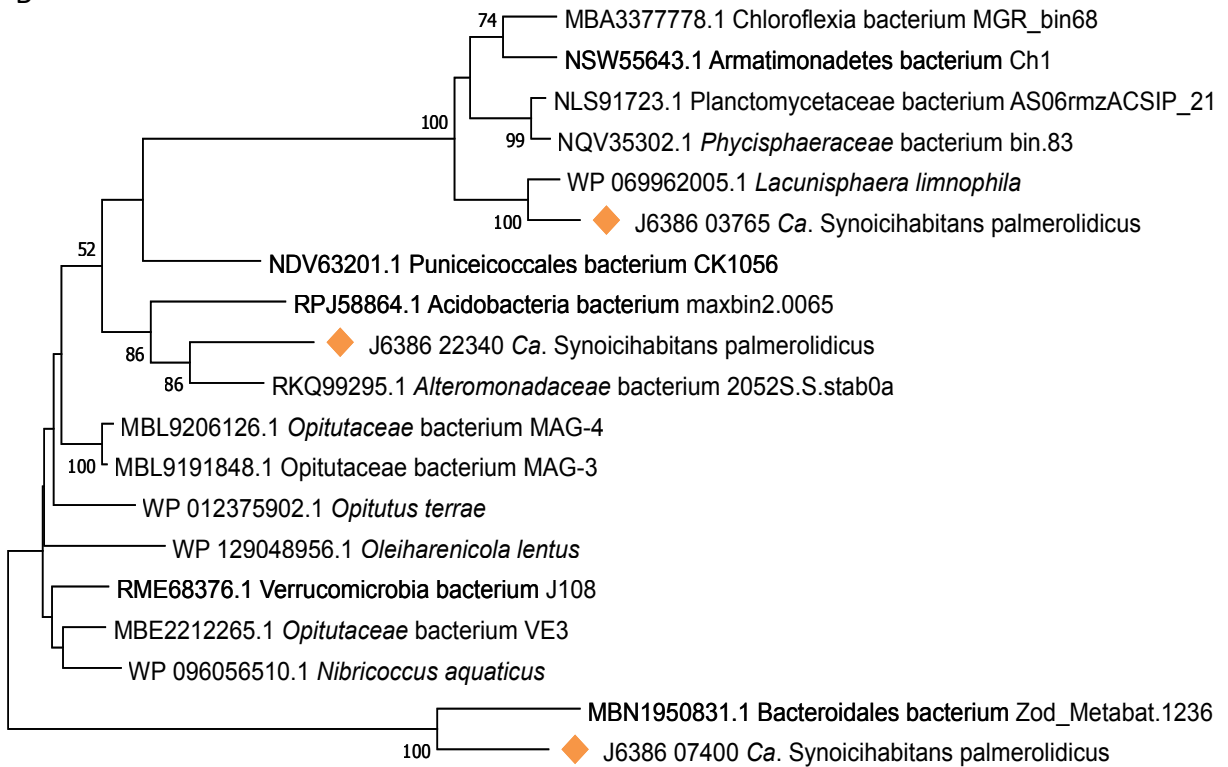

0.50
