# Supplementary material for: Discovery of an Antarctic Ascidian-Associated Uncultivated Verrucomicrobia with Antimelanoma Palmerolide Biosynthetic Potential
Source: PubMed Central journal article supplement (PMC8636102; doi:10.1128/msphere.00759-21), 2021-12-01
Supplement: msphere.00759-21-st001.pdf [file msphere.00759-21-st001.pdf]

| Metagenome samples     | <i>Synicium adareanum</i> lobe ID |                |                     |                     | Metagenome Assemblies       |                                                        |
|------------------------|-----------------------------------|----------------|---------------------|---------------------|-----------------------------|--------------------------------------------------------|
|                        | Nor2c-2007                        | Nor2a-2007     | Bon1c-2011          | Del2b-2011          | Nor2c-2007<br>and Nor2a2007 | Nor2c-2007,<br>Nor2a2007,<br>Bon1c-2011,<br>Del2b-2011 |
| Sequencing Technology  | 454                               | Ion Proton     | PacBio x 2<br>lanes | PacBio x 4<br>lanes | 454+Ion Proton              | 454, Ion Proton,<br>PacBio (Feb<br>2020)               |
| Raw Reads              |                                   |                |                     |                     |                             |                                                        |
| Reads                  | 1,570,137                         | 89,330,870     | 2,499,689           | 3,014,737           | 90,900,996                  | 5,600,821                                              |
| Total Bases (bp)       | 904,455,285                       | 17,053,251,055 | 23,936,900,178      | 4,127,276,138       | 17,957,706,340              | 28,213,247,451                                         |
| Mean Read Length (bp)  | 550                               | 190            | 9575.95             | 1369.03             | 197.55                      | 5037.34                                                |
| Assembly               |                                   |                |                     |                     | CoAssembly 1                | CoAssembly 2                                           |
| Number of contigs      | -                                 | -              | 3,485               | 1,108               | 86,387                      | 4,215                                                  |
| N50 bp                 | -                                 | -              | 42,473              | 31,254              | 2,778                       | 40,098                                                 |
| Max contig size bp     | -                                 | -              | 1,040,994           | 1,419,724           | 153,680                     | 2,235,039                                              |
| Min contig size bp     | -                                 | -              | 1,967               | 426                 | 200                         | 239                                                    |
| total assembly size bp | -                                 | -              | 88,595,314          | 20,158,880          | 144,953,904                 | 97,970,181                                             |
