# Supplementary material for: Discovery of an Antarctic Ascidian-Associated Uncultivated Verrucomicrobia with Antimelanoma Palmerolide Biosynthetic Potential
Source: PubMed Central journal article supplement (PMC8636102; doi:10.1128/msphere.00759-21), 2021-12-01
Supplement: msphere.00759-21-st002.pdf [file msphere.00759-21-st002.pdf]

| Region | Type                          | From   | To     | Most similar cluster                          | Class                                                    | Similarity |
|--------|-------------------------------|--------|--------|-----------------------------------------------|----------------------------------------------------------|------------|
| 12.1   | Bacteriocin                   | 11,851 | 22,753 |                                               |                                                          |            |
| 16.1   | NRPS                          | 1      | 49,947 | nematophin                                    | NRP                                                      | 25%        |
| 92.1   | NRPS                          | 1      | 48,177 | Puwainaphycin F /<br>minutissamide B,<br>C, D | NRP                                                      | 61%        |
| 24.1   | NRPS,<br>T1PKS                | 1      | 41,119 | rakicidin A /<br>rakicidin B                  | NRP:Cyclic<br>depsipeptide+polyketide:<br>modular type 1 | 22%        |
| 27.1   | NRPS,<br>T1PKS                |        | 41,399 |                                               |                                                          |            |
| 38.1   | NRPS,<br>transAT-<br>PKS-like | 1      | 41,662 |                                               |                                                          |            |
| 84.1   | Terpene                       | 24,732 | 46,436 | hopene                                        | Terpene                                                  | 23%        |
| 87.1   | Terpene                       | 20,623 | 41,480 |                                               |                                                          |            |
| 72.1   | transAT-<br>PKS-like,<br>NRPS | 1      | 42,310 | chlorotonil A                                 | Polyketide                                               | 15%        |
| 78.1   | transAT-<br>PKS-like,<br>NRPS | 1      | 68,977 | pyxipyrrolone A/<br>pyxipyrrolone B           | NRP + Polyketide                                         | 33%        |
