# Supplementary material for: Discovery of an Antarctic Ascidian-Associated Uncultivated Verrucomicrobia with Antimelanoma Palmerolide Biosynthetic Potential
Source: PubMed Central journal article supplement (PMC8636102; doi:10.1128/msphere.00759-21), 2021-12-01
Supplement: msphere.00759-21-st003.pdf [file msphere.00759-21-st003.pdf]

| Source               | Bin Id                                  | Ca. S. palmerolidicus-<br>2 | Ca. S. palmerolidicus-<br>1                                | Bin8 - clean<br>CoAssmembly 2                                 | Bin 8<br>CoAssmembly 2 | Bin 4<br>CoAssembly 1 | Bin 1<br>Coassembly 1 | Bin 2<br>Coassembly 1 |
|----------------------|-----------------------------------------|-----------------------------|------------------------------------------------------------|---------------------------------------------------------------|------------------------|-----------------------|-----------------------|-----------------------|
| GTDB-Tk              | Domain                                  | Bacteria                    | Bacteria                                                   | Bacteria                                                      | Bacteria               | Bacteria              | Bacteria              | Root (UID1)           |
|                      | Phylum                                  | Verrucomicrobiota           | Verrucomicrobiota                                          | Verrucomicrobiota                                             | Verrucomicrobiota      | Verrucomicrobiota     | NA                    | NA                    |
|                      | Classification                          | Verrucomicrobiae            | Verrucomicrobiae                                           | Verrucomicrobiae                                              | Verrucomicrobiae       | Verrucomicrobiae      | NA                    | NA                    |
|                      | Order                                   | Opitutales                  | Opitutales                                                 | Opitutales                                                    | Opitutales             | Opitutales            | NA                    | NA                    |
|                      | Family                                  | Optitutaceae                | Optitutaceae                                               | Optitutaceae                                                  | Optitutaceae           | Optitutaceae          | NA                    | NA                    |
|                      | Genus                                   | UBA6669                     | UBA6669                                                    | UBA6669                                                       | UBA6669                | NA                    | NA                    | NA                    |
| CheckM               | # genomes                               | 88                          | 88                                                         | 88                                                            | 88                     | 88                    | 5449                  | 5656                  |
|                      | # markers                               | 227                         | 227                                                        | 230                                                           | 230                    | 230                   | 104                   | 56                    |
|                      | # marker sets                           | 146                         | 146                                                        | 148                                                           | 148                    | 148                   | 58                    | 24                    |
|                      | 0                                       | 7                           | 51                                                         | 35                                                            | 34                     | 197                   | 103                   | 56                    |
|                      | 1                                       | 218                         | 174                                                        | 184                                                           | 169                    | 33                    | 1                     | 0                     |
|                      | 2                                       | 1                           | 1                                                          | 10                                                            | 25                     | 0                     | 0                     | 0                     |
|                      | 3                                       | 0                           | 0                                                          | 1                                                             | 2                      | 0                     | 0                     | 0                     |
|                      | 4                                       | 0                           | 0                                                          | 0                                                             | 0                      | 0                     | 0                     | 0                     |
|                      | 5                                       | 1                           | 1                                                          | 0                                                             | 0                      | 0                     | 0                     | 0                     |
|                      | Completeness                            | 96.04                       | 71.89                                                      | 80.86                                                         | 82.04                  | 4.59                  | 1.72                  | 0                     |
| Contamination        | 3.42                                    | 3.42                        | 4.62                                                       | 8.43                                                          | 0                      | 0                     | 0                     |                       |
| Strain heterogeneity | 100                                     | 100                         | 76.92                                                      | 35.48                                                         | 0                      | 0                     | 0                     |                       |
| GTDB-Tk              | closest_placement_reference             | NA                          | GCA_002455175.1                                            | GCA_002321895.1                                               | NA                     | NA                    | NA                    | NA                    |
|                      | closest_placement_radius                | NA                          | 95                                                         | 95                                                            | NA                     | NA                    | NA                    | NA                    |
|                      | closest_placement_taxonomy<br>- species | NA                          | UBA6669<br>sp002455175                                     | UBA6669<br>sp002455175                                        | NA                     | NA                    | NA                    | NA                    |
|                      | closest_placement_ani                   | NA                          | 75.26                                                      | 75.16                                                         | NA                     | NA                    | NA                    | NA                    |
|                      | closest_placement_af                    | NA                          | 0.02                                                       | 0.02                                                          | NA                     | NA                    | NA                    | NA                    |
|                      | classification_method                   | NA                          | taxonomic<br>classification defined<br>by topology and ANI | taxonomic<br>classification<br>defined by topology<br>and ANI | NA                     | NA                    | NA                    | NA                    |
|                      | aa_percent                              | NA                          | 67.3                                                       | 56.53                                                         | 61.11                  | NA                    | NA                    | NA                    |
|                      | red_value                               | NA                          | 0.920899756                                                | 0.920064441                                                   | 0.910022563            | NA                    | NA                    | NA                    |
