# Supplementary material for: Discovery of an Antarctic Ascidian-Associated Uncultivated Verrucomicrobia with Antimelanoma Palmerolide Biosynthetic Potential
Source: PubMed Central journal article supplement (PMC8636102; doi:10.1128/msphere.00759-21), 2021-12-01
Supplement: msphere.00759-21-st004.pdf [file msphere.00759-21-st004.pdf]

| Species                             | Strain    | Genome accession    | % GC   |
|-------------------------------------|-----------|---------------------|--------|
| <i>Cephalotococcus capnophilus</i>  | CV41      | RS_GCF_001580045.1  | 60.54% |
| <i>Cephalotococcus primus</i>       | CAG34     | RS_GCF_001580015.1  | 63.03% |
| <i>Cephalitococcus</i> sp002367815* |           | GB_GCA_002367815.1  | 54.25% |
| <i>Cephalitococcus</i> sp002713695* |           | GB_GCA_002713695.1  | 55.96% |
| <i>Cephalitococcus</i> sp002713695* |           | GB_GCA_002471335.1  | 54.13% |
| <i>Ca. Didemnitutus mandela</i> *   |           | GB_GCA_002591725.1  | 51.93% |
| <i>Ereboglobus luteus</i>           | Ho45      | RS_GCF_003096195.18 | 59.67% |
| <i>Ereboglobus</i> sp001650175      | TSB47     | RS_GCF_001650175.1  | 62.88% |
| <i>Geminisphaera colitermitum</i>   | TAV2      | RS_GCF_000171235.2  | 60.93% |
| <i>Geminisphaera colitermitum</i>   | TAV3      | RS_GCF_001653815.2  | 60.89% |
| <i>Geminisphaera colitermitum</i>   | TAV4      | RS_GCF_001653825.2  | 60.85% |
| <i>Geminisphaera</i> sp000242935    | TAV5      | RS_GCF_000242935.2  | 63.45% |
| <i>Geminisphaera</i> sp000242935    | TAV1      | RS_GCF_000243495.5  | 63.25% |
| <i>Lacunisphaera limnophila</i>     | IG16b     | RS_GCF_001746835.1  | 66.48% |
| <i>Lacunisphaera</i> sp001464505    |           | GB_GCA_001464505.1  | 64.27% |
| <i>Lacunisphaera</i> sp002304425    |           | GB_GCA_002304425.1  | 56.80% |
| <i>Lacunisphaera</i> sp004118375    | TWA-58    | GB_GCA_004118375.1  | 65.30% |
| <i>Lacunisphaera</i> sp005787865    |           | GB_GCA_005787865.1  | 56.64% |
| <i>Lacunisphaera</i> sp900104025    | GAS368    | GB_GCA_900104025.1  | 65.67% |
| <i>Nibricoccus aquaticus</i>        | HZ-65     | RS_GCF_002310495.1  | 65.25% |
| <i>Opitutus terrae</i>              | PB90-1    | RS_GCF_000019965.1  | 65.34% |
| <i>Opitutus</i> sp002288455         |           | GB_GCA_002288455.1  | 67.69% |
| <i>Opitutus</i> sp002304435         |           | GB_GCA_002304435.1  | 69.98% |
| <i>Opitutus</i> sp003054705         | ER46      | GB_GCA_003054705.1  | 67.07% |
| <i>Opitutus</i> sp005786775         |           | GB_GCA_005786775.1  | 70.04% |
| <i>Opitutus</i> sp005792355         |           | GB_GCA_005792355.1  | 64.74% |
| <i>Opitutus</i> sp005792355         |           | GB_GCA_005779485.1  | 64.83% |
| B12-G4 sp003641745                  |           | GB_GCA_003641745.1  | 58.28% |
| DG1235 sp000155695                  | DG1235    | RS_GCF_000155695.1  | 54.26% |
| EW11 sp003054665                    | EW11      | RS_GCF_003054665.1  | 63.63% |
| Fen-1467 sp003142615                |           | GB_GCA_003142615.1  | 64.26% |
| Fen-1467 sp003142615                |           | GB_GCA_003141355.1  | 63.94% |
| Fen-1467 sp003142615                |           | GB_GCA_003142335.1  | 64.50% |
| Fen-1467 sp003142955                |           | GB_GCA_003142955.1  | 62.41% |
| Fen-1467 sp003142955                |           | GB_GCA_003157795.1  | 62.27% |
| Fen-1467 sp003142955                |           | GB_GCA_003154875.1  | 62.37% |
| Fen-1467 sp003153035                |           | GB_GCA_003153035.1  | 64.04% |
| Fen-1467 sp003153035                |           | GB_GCA_003160855.1  | 64.04% |
| Fen-1467 sp003153035                |           | GB_GCA_003157495.1  | 64.27% |
| Fen-1467 sp003157575                |           | GB_GCA_003157575.1  | 63.34% |
| IMCC26134 sp002382525               |           | GB_GCA_002382525.1  | 63.52% |
| IMCC26134 sp002382525               |           | GB_GCA_002383805.1  | 63.56% |
| IMCC26134 A sp000972765             | IMCC26134 | RS_GCF_000972765.1  | 61.28% |
| J108 sp003694825                    |           | GB_GCA_003694825.1  | 65.52% |
| Opi-474 sp003402695                 |           | GB_GCA_003402695.1  | 65.60% |
| Palsa-1447 sp003140665              |           | GB_GCA_003140665.1  | 66.23% |

| Species    | Strain       | Genome accession   | % GC   |
|------------|--------------|--------------------|--------|
| Palsa-1447 | sp003140665  | GB_GCA_003133585.1 | 66.47% |
| Palsa-1447 | sp003140665  | GB_GCA_003167995.1 | 66.10% |
| Palsa-1447 | sp003140665  | GB_GCA_003167115.1 | 66.40% |
| Palsa-1447 | sp003151495  | GB_GCA_003151495.1 | 66.51% |
| Palsa-1447 | sp003151515  | GB_GCA_003151515.1 | 67.03% |
| Palsa-1447 | sp003164715  | GB_GCA_003164715.1 | 66.99% |
| Palsa-1447 | sp003168315  | GB_GCA_003168315.1 | 66.69% |
| Tous-C4FEB | sp002304445  | GB_GCA_002304445.1 | 62.76% |
| Tous-C4FEB | sp002304445  | GB_GCA_002288405.1 | 62.94% |
| Tous-C4FEB | sp002304445  | GB_GCA_005789435   | 62.94% |
| Tous-C4FEB | sp002737275  | GB_GCA_002737275.1 | 62.84% |
| Tous-C4FEB | sp005799525  | GB_GCA_005799525.1 | 63.21% |
| UBA2377    | sp002344205  | GB_GCA_002344205.1 | 65.29% |
| UBA2377    | sp002344205  | GB-GCA_002343065.1 | 65.24% |
| UBA5691    | sp002420185* | GB_GCA_002320185.1 | 48.68% |
| UBA5691    | sp002420265* | GB_GCA_002420265.1 | 49.76% |
| UBA5691    | sp002420265* | GB_GCA_002722675.1 | 49.75% |
| UBA5691    | sp002424265* | GB_GCA_002170515.2 | 49.90% |
| UBA5691    | sp002474325* | GB_GCA_002474325.1 | 50.38% |
| UBA5691    | sp002474325* | GB_GCA_002450395.1 | 50.42% |
| UBA4691    | sp002694885* | GB_GCA_002694885.1 | 51.27% |
| UBA4691    | sp002694885* | GB_GCA_003525105.1 | 51.45% |
| UBA6669    | sp002455175  | GB_GCA_002455175.1 | 57.04% |
|            |              | <i>average</i>     | 61.58% |
|            |              | <i>stdev</i>       | 0.06   |
