# Supplementary material for: Discovery of an Antarctic Ascidian-Associated Uncultivated Verrucomicrobia with Antimelanoma Palmerolide Biosynthetic Potential
Source: PubMed Central journal article supplement (PMC8636102; doi:10.1128/msphere.00759-21), 2021-12-01
Supplement: msphere.00759-21-st005.pdf [file msphere.00759-21-st005.pdf]

| Gene Target                            | Primer ID        | Sequence                   |
|----------------------------------------|------------------|----------------------------|
| NRPS Condensation domain (NRPS)        | PalA-NRPS_ 531F  | 5'-CGCCAAGTTGGATCGAGACT-3' |
|                                        | PalA-NRPS_ 650R* | 5'-GAGCGATTGGTGATTCCGGA-3' |
| Acyl transferase (AT) #                | PalA-AT-1_624F   | 5'-CACCGCACTACCCCATGAAT-3' |
|                                        | PalA-AT-1_743R*  | 5'-CAGACGGAACCTGAGTTCGT-3' |
| 3'hydroxymethylglutaryl synthase (HCS) | PalA-HCS_989F    | 5'-ACTGGGTATTCGGCGTGAAG-3' |
|                                        | PalA-HCS_1108R*  | 5'-GGTGCGTAACTACCATCGGG-3' |

† GBlocks synthetic positive qPCR control sequence in which the NRPS positions 531-650 in the CDS are highlighted in yellow, luciferase positions 589-708 are highlighted in gray (not used in this study), AT1 positions 624-743 are highlighted in light blue and HCS are highlighted in green.

5'ATGTA CTTGGAATCCGACACTTTTTT **CGCCAAGTTGGATCGAGACTACTGGTTGCAGCGTTTCCCC**  
**AAGGGTTCCAGCCCGTGTTC**CCGCGAATGGCGATATTAAGGACTCCGGCGGGGAGATGGAGCG  
**ATTGGTGATTCCGGA**TTTTTTTCGACCTTGAAGA AACTCGCTAAAAAATTGCGCGTTACCGTGCTGC  
ACGGGCTGAGGCGGGCCTGGATCCGGTGGGAGGGTGTGTGACTCTCATGCTGCACACGTTTGTGG  
ATCCCGATTTTTTTT **CACCGCACTACCCCATGAATCGACGACGCTAAAACAGATGTTGGCGCGGCAAA**  
**TTACGAGCCCGGTGCGATGGACAGAGACCATGCGCTGGCTGTTTCGGCAGACGGAACCTGAGTTCG**  
TTTTTTTACTGGGTATTCGGCGTGAAGGATCAGGAAGTGGACTTAGCTCCTTACCGAAACCTCTACG  
**ACCAAACCTTGGCGGGCCGTGGTTTGTGGTGTGAAAGGGGTGCGTAACTACCATCGGG**AATATG  
ACTGGAGTTGATAA 3'

\* Reverse sequences are not reverse and complimented.

# The acyltransferase domain targeted was the first of two domains in the putative *pal* BGC as oriented with 5' being the NRP at the beginning of the cluster.
