# Supplementary material for: Discovery of an Antarctic Ascidian-Associated Uncultivated Verrucomicrobia with Antimelanoma Palmerolide Biosynthetic Potential
Source: PubMed Central journal article supplement (PMC8636102; doi:10.1128/msphere.00759-21), 2021-12-01
Supplement: msphere.00759-21-st006.pdf [file msphere.00759-21-st006.pdf]

| IMG ID     | GenBank Accession | Taxon ID                                                                       | infB | lepA | pheS | rplB | rplC | rplD | rplE | rplF | rplK | rplN | rplO | rplP | rpsB | rpsC | rpsE | rpsG | rpsH | rpsI | rpsJ | rpsK | rpsL | rpsM | rpsQ | rpsS | 16S rRNA |
|------------|-------------------|--------------------------------------------------------------------------------|------|------|------|------|------|------|------|------|------|------|------|------|------|------|------|------|------|------|------|------|------|------|------|------|----------|
|            |                   | <i>Candidatus Synicohabitus palmerolidicus</i>                                 | +    | +    | +    | +    | +    | +    | +    | +    | +    | +    | +    | +    | +    | +    | +    | +    | +    | +    | +    | +    | +    | +    | +    | +    | +        |
| 647533243  | GCA_000155695     | <i>Verrucomicrobiales</i> sp. DG1235                                           | +    | +    | +    | +    | +    | +    | +    | +    | +    | +    | +    | +    | +    | +    | +    | +    | +    | +    | +    | +    | +    | +    | +    | +    | +        |
| 2228664034 | GCA_000383755     | <i>Verrucomicrobia</i> bacterium SCGC AAA300-N18 (unscreened)                  | +    | +    | -    | +    | +    | +    | -    | -    | +    | -    | +    | -    | +    | +    | -    | +    | +    | -    | +    | -    | +    | -    | +    | +    | +        |
| 2228664038 | GCA_000385315     | <i>Verrucomicrobia</i> bacterium SCGC AAA164-P11 (unscreened)                  | -    | -    | -    | -    | -    | -    | -    | -    | -    | -    | -    | -    | -    | -    | -    | -    | -    | -    | -    | -    | -    | -    | -    | -    | -        |
| 2228664042 | GCA_000385235     | <i>Verrucomicrobia</i> bacterium SCGC AAA164-A08 (unscreened)                  | -    | -    | -    | -    | -    | -    | -    | -    | -    | -    | -    | -    | -    | -    | -    | -    | -    | -    | -    | -    | -    | -    | -    | -    | -        |
| 2228664043 | GCA_000385255     | <i>Verrucomicrobia</i> bacterium SCGC AAA164-B23 (unscreened)                  | -    | -    | -    | -    | -    | -    | -    | -    | -    | -    | -    | -    | -    | -    | -    | -    | -    | -    | -    | -    | -    | -    | -    | -    | -        |
| 2228664044 | GCA_000385275     | <i>Verrucomicrobia</i> bacterium SCGC AAA164-I21 (unscreened)                  | -    | -    | +    | +    | +    | +    | +    | +    | +    | +    | +    | +    | +    | +    | +    | +    | +    | +    | +    | +    | +    | +    | +    | +    | +        |
| 2228664050 | GCA_000383735     | <i>Verrucomicrobia</i> bacterium SCGC AAA164-M04 (unscreened)                  | -    | -    | -    | -    | -    | -    | -    | -    | +    | -    | +    | -    | +    | +    | +    | +    | +    | +    | +    | +    | +    | +    | +    | +    | -        |
| 2228664051 | GCA_000385295     | <i>Verrucomicrobia</i> bacterium SCGC AAA164-N20 (unscreened)                  | -    | -    | -    | +    | +    | +    | +    | +    | -    | +    | +    | +    | -    | +    | +    | +    | +    | -    | +    | +    | +    | +    | +    | +    | +        |
| 2236347002 | GCA_000383715     | <i>Verrucomicrobia</i> bacterium SCGC AAA164-E04 (unscreened)                  | +    | -    | +    | +    | +    | +    | +    | +    | +    | +    | +    | +    | -    | +    | +    | +    | +    | +    | +    | +    | +    | +    | +    | +    | +        |
| 2236347003 | GCA_000264625     | <i>Verrucomicrobia</i> bacterium SCGC AAA168-E21                               | +    | -    | +    | -    | -    | -    | -    | -    | +    | -    | -    | -    | -    | -    | -    | -    | -    | -    | -    | -    | -    | -    | -    | -    | +        |
| 2236347021 | GCA_000264645     | <i>Verrucomicrobia</i> bacterium SCGC AAA168-F10                               | +    | -    | +    | +    | +    | +    | +    | +    | +    | -    | +    | +    | -    | +    | -    | +    | -    | -    | +    | +    | +    | +    | +    | +    | +        |
| 2236661017 | GCA_000382665     | <i>Verrucomicrobia</i> bacterium SCGC AAA300-K03 (unscreened)                  | -    | -    | -    | +    | +    | +    | +    | +    | +    | +    | +    | +    | +    | +    | +    | +    | +    | +    | +    | +    | +    | +    | +    | +    | +        |
| 2236661018 | GCA_000382685     | <i>Verrucomicrobia</i> bacterium SCGC AAA300-O17 (unscreened)                  | -    | -    | -    | +    | +    | +    | +    | +    | +    | +    | +    | +    | +    | +    | +    | +    | +    | +    | +    | +    | +    | +    | +    | +    | -        |
| 2517572138 | GCA_000264585     | <i>Verrucomicrobia</i> bacterium SCGC AAA164-A21 (unscreened)                  | -    | -    | -    | -    | -    | -    | -    | -    | -    | -    | -    | -    | -    | -    | -    | -    | -    | -    | -    | -    | -    | -    | -    | -    | -        |
| 2517572141 | GCA_000264625     | <i>Verrucomicrobia</i> bacterium SCGC AAA168-E21 (unscreened)                  | +    | -    | +    | -    | -    | -    | -    | -    | +    | -    | -    | -    | -    | -    | -    | -    | -    | -    | -    | -    | -    | -    | -    | -    | +        |
| 2517572140 | GCA_000264605     | <i>Verrucomicrobia</i> bacterium SCGC AAA164-O14 (unscreened)                  | -    | +    | +    | +    | +    | +    | +    | +    | -    | +    | -    | +    | +    | +    | +    | +    | +    | -    | +    | -    | +    | -    | +    | +    | +        |
| 2517572142 |                   | <i>Verrucomicrobia</i> bacterium SCGC AAA168-F10 (unscreened)                  | +    | -    | +    | -    | -    | -    | -    | -    | +    | -    | -    | -    | -    | -    | -    | -    | -    | -    | -    | -    | -    | -    | -    | -    | +        |
| 2616645036 |                   | <i>D. pulchra</i> bleached metagenome bin377                                   | +    | +    | +    | +    | +    | +    | +    | +    | +    | +    | +    | +    | +    | +    | +    | +    | +    | +    | +    | +    | +    | +    | +    | +    | +        |
| 2634166657 |                   | <i>Verrucomicrobia</i> bacterium SCGC AC-661-N10 (unscreened)                  | -    | +    | -    | -    | -    | -    | -    | -    | +    | -    | -    | -    | -    | -    | -    | -    | -    | -    | -    | -    | -    | -    | -    | -    | +        |
| 2634166686 |                   | <i>Verrucomicrobia</i> bacterium SCGC AD-105-D22 (unscreened)                  | -    | -    | +    | +    | -    | -    | +    | +    | -    | +    | +    | +    | -    | +    | +    | -    | +    | -    | -    | +    | -    | +    | +    | +    | +        |
| 2634166709 |                   | <i>Verrucomicrobia</i> bacterium SCGC AD-265-E10 (unscreened)                  | -    | -    | -    | -    | -    | -    | -    | -    | -    | -    | -    | -    | -    | -    | -    | -    | -    | -    | -    | -    | -    | -    | -    | -    | -        |
| 2634166715 |                   | <i>Verrucomicrobia</i> bacterium SCGC AAA240-M19 (unscreened)                  | +    | +    | +    | +    | -    | +    | +    | +    | -    | +    | +    | +    | +    | +    | +    | +    | +    | +    | +    | +    | +    | +    | +    | +    | +        |
| 2634166718 |                   | <i>Verrucomicrobia</i> bacterium SCGC AAA242-O13 (unscreened)                  | -    | -    | -    | -    | -    | -    | -    | -    | -    | -    | -    | -    | -    | -    | -    | -    | -    | -    | -    | -    | -    | -    | -    | -    | +        |
| 2634166725 |                   | <i>Verrucomicrobia</i> bacterium SCGC AB-606-A23 (unscreened)                  | -    | -    | -    | +    | +    | +    | +    | +    | -    | +    | +    | +    | -    | +    | -    | +    | +    | +    | +    | +    | +    | +    | +    | +    | +        |
| 2634166742 |                   | <i>Verrucomicrobia</i> bacterium SCGC AB-661-L11 (unscreened)                  | -    | -    | -    | -    | -    | -    | -    | -    | -    | -    | -    | -    | -    | -    | -    | -    | -    | -    | -    | -    | -    | -    | -    | -    | -        |
| 2634166743 |                   | <i>Verrucomicrobia</i> bacterium SCGC AB-661-P22 (unscreened)                  | -    | -    | -    | -    | -    | -    | -    | -    | +    | -    | -    | -    | +    | -    | -    | -    | -    | -    | -    | -    | -    | -    | -    | -    | +        |
| 2634166791 |                   | <i>Verrucomicrobia</i> bacterium SCGC AC-312-P03 (unscreened)                  | -    | -    | -    | -    | -    | -    | -    | -    | -    | -    | -    | -    | -    | -    | -    | -    | -    | -    | -    | -    | -    | -    | -    | -    | -        |
| 2651870083 |                   | unclassified <i>Verrucomicrobiales</i> Bin 11                                  | +    | +    | -    | -    | -    | -    | -    | -    | -    | -    | -    | -    | +    | -    | -    | -    | -    | +    | -    | +    | -    | +    | -    | -    | +        |
| 2651870084 |                   | unclassified <i>Verrucomicrobiales</i> Bin 46                                  | -    | -    | -    | -    | -    | -    | -    | -    | +    | -    | -    | -    | +    | -    | -    | -    | -    | +    | -    | +    | -    | +    | -    | -    | -        |
| 2651870085 |                   | unclassified <i>Verrucomicrobiales</i> Bin 30                                  | -    | -    | -    | -    | -    | -    | +    | +    | -    | +    | -    | -    | -    | +    | +    | +    | +    | -    | -    | +    | +    | +    | -    | -    | -        |
| 2651870086 |                   | unclassified <i>Verrucomicrobiales</i> Bin 34                                  | +    | -    | -    | -    | -    | +    | +    | -    | +    | +    | +    | +    | +    | +    | +    | +    | +    | -    | -    | +    | +    | +    | +    | +    | -        |
| 2651870087 |                   | unclassified <i>Verrucomicrobiales</i> Bin 65                                  | -    | -    | -    | +    | -    | -    | -    | -    | -    | +    | -    | +    | -    | +    | -    | -    | -    | -    | -    | -    | -    | -    | -    | +    | +        |
| 2657245246 |                   | <i>Verrucomicrobia</i> bacterium SCGC AC-312_D05v2 (unscreened)                | -    | -    | -    | -    | -    | -    | -    | -    | -    | -    | -    | -    | -    | -    | -    | -    | -    | -    | -    | -    | -    | -    | -    | -    | +        |
| 2657245247 |                   | <i>Verrucomicrobia</i> bacterium SCGC AC-312_D05v2 (contamination screened)    | -    | -    | -    | -    | -    | -    | -    | -    | -    | -    | -    | -    | -    | -    | -    | -    | -    | -    | -    | -    | -    | -    | -    | -    | +        |
| 2657245291 |                   | <i>Verrucomicrobia</i> bacterium SCGC AC-337_K21 - v2 (unscreened)             | -    | -    | -    | -    | -    | -    | -    | -    | -    | -    | -    | -    | -    | -    | -    | -    | -    | -    | -    | -    | -    | -    | -    | -    | +        |
| 2657245292 |                   | <i>Verrucomicrobia</i> bacterium SCGC AC-337_K21 - v2 (contamination screened) | -    | -    | -    | -    | -    | -    | -    | -    | -    | -    | -    | -    | -    | -    | -    | -    | -    | -    | -    | -    | -    | -    | -    | -    | +        |
| 2657245323 |                   | <i>Verrucomicrobia</i> bacterium SCGC AC-312_O22 - v2 (unscreened)             | -    | +    | -    | -    | -    | -    | -    | -    | -    | -    | -    | -    | -    | -    | -    | -    | -    | -    | -    | -    | -    | -    | -    | -    | +        |
| 2657245324 |                   | <i>Verrucomicrobia</i> bacterium SCGC AC-312_O22 - v2 (contamination screened) | -    | -    | -    | -    | -    | -    | -    | -    | -    | -    | -    | -    | -    | -    | -    | -    | -    | -    | -    | -    | -    | -    | -    | -    | -        |
| 2663762693 |                   | <i>Verrucomicrobia</i> bacterium SCGC AC-312_N19v2 (unscreened)                | -    | +    | -    | -    | -    | -    | -    | -    | -    | -    | -    | -    | -    | -    | -    | -    | -    | -    | -    | -    | -    | -    | -    | -    | +        |
| 2684622978 |                   | <i>Verrucomicrobia</i> bacterium SCGC AG-542-N08                               | -    | -    | +    | -    | -    | -    | -    | -    | -    | -    | -    | -    | +    | -    | -    | -    | -    | -    | -    | -    | -    | -    | -    | -    | +        |
| 2684622991 |                   | <i>Verrucomicrobia</i> bacterium SCGC AG-542-I16                               | +    | -    | -    | -    | -    | -    | -    | -    | -    | -    | -    | -    | -    | -    | -    | -    | -    | -    | -    | -    | -    | -    | -    | -    | -        |
| 2693429924 |                   | <i>Verrucomicrobia</i> bacterium SCGC AC-337_A14 - v2 (unscreened)             | -    | -    | -    | -    | -    | -    | -    | -    | -    | -    | -    | -    | -    | -    | -    | -    | -    | -    | -    | -    | -    | -    | -    | -    | +        |
| 2693429925 |                   | <i>Verrucomicrobia</i> bacterium SCGC AC-337_A14 - v2 (contamination screened) | -    | -    | -    | -    | -    | -    | -    | -    | -    | -    | -    | -    | -    | -    | -    | -    | -    | -    | -    | -    | -    | -    | -    | -    | +        |
| 2693429980 |                   | <i>Verrucomicrobia</i> bacterium SCGC AC-337_J20 - v2 (unscreened)             | -    | -    | -    | -    | -    | -    | -    | -    | +    | -    | +    | -    | -    | +    | -    | +    | -    | -    | +    | -    | +    | -    | +    | -    | -        |
| 2693429981 |                   | <i>Verrucomicrobia</i> bacterium SCGC AC-337_J20 - v2 (contamination screened) | -    | -    | -    | -    | -    | -    | -    | -    | +    | -    | +    | -    | -    | +    | -    | +    | -    | -    | +    | -    | +    | -    | +    | -    | -        |
| 2695420979 |                   | unclassified <i>Verrucomicrobiales</i> bin 1                                   | -    | -    | +    | +    | +    | +    | +    | +    | -    | -    | +    | -    | +    | -    | +    | +    | +    | +    | +    | +    | -    | -    | -    | -    | -        |
| 2695420980 |                   | unclassified <i>Verrucomicrobiales</i> bin 2                                   | -    | -    | -    | +    | -    | -    | -    | -    | -    | -    | -    | -    | +    | -    | -    | -    | -    | -    | -    | -    | -    | -    | -    | -    | +        |

| IMG ID     | GenBank Accession | Taxon ID                                                             | infB | lepA | pheS | rplB | rplC | rplD | rplE | rplF | rplK | rplN | rplO | rplP | rpsB | rpsC | rpsE | rpsG | rpsH | rpsI | rpsJ | rpsK | rpsL | rpsM | rpsQ | rpsS | 16S rRNA |
|------------|-------------------|----------------------------------------------------------------------|------|------|------|------|------|------|------|------|------|------|------|------|------|------|------|------|------|------|------|------|------|------|------|------|----------|
| 2700988675 |                   | Verrucomicrobia bacterium SCGC AC-337_A09v3 (contamination screened) | -    | -    | -    | -    | -    | -    | -    | -    | -    | -    | -    | -    | -    | -    | -    | -    | -    | -    | -    | -    | -    | -    | -    | -    | +        |
| 2731639125 |                   | Verrucomicrobia bacterium SCGC AG-485_L14 (contamination screened)   | -    | -    | +    | -    | -    | -    | -    | -    | -    | -    | -    | -    | -    | -    | -    | -    | -    | -    | -    | -    | -    | -    | -    | -    | +        |
| 2731639127 |                   | Verrucomicrobia bacterium SCGC AG-485_G21 (contamination screened)   | -    | -    | -    | +    | +    | +    | +    | -    | +    | +    | +    | +    | -    | +    | +    | +    | +    | -    | +    | +    | +    | +    | +    | +    | +        |
| 2731639129 |                   | Verrucomicrobia bacterium SCGC AG-487_A21 (contamination screened)   | -    | -    | +    | -    | -    | -    | -    | -    | -    | -    | -    | -    | +    | -    | -    | -    | -    | -    | -    | -    | -    | -    | -    | -    | +        |
| 2731639131 |                   | Verrucomicrobia bacterium SCGC AG-487_G17 (contamination screened)   | +    | -    | -    | -    | -    | -    | -    | -    | -    | -    | -    | -    | -    | -    | -    | -    | -    | -    | -    | -    | -    | -    | -    | -    | +        |
| 2739367775 |                   | Verrucomicrobiales bacterium JGI_01_E13 (contamination screened)     | -    | +    | -    | +    | +    | +    | -    | -    | +    | -    | -    | -    | -    | -    | -    | -    | +    | -    | -    | +    | -    | -    | -    | +    | -        |
| 2786546549 | GCA_002726435     | Opiritae bacterium NP78                                              | -    | -    | +    | +    | +    | +    | +    | +    | -    | +    | +    | +    | -    | +    | +    | +    | +    | +    | +    | +    | +    | +    | +    | +    | -        |
| 2786546550 | GCA_002716045     | Opiritae bacterium SP85                                              | +    | +    | +    | +    | +    | +    | +    | +    | +    | +    | +    | +    | -    | +    | +    | +    | +    | +    | +    | +    | +    | +    | +    | +    | -        |
| 2786546551 | GCA_002722545     | Opiritae bacterium SP216                                             | +    | +    | +    | +    | +    | +    | +    | +    | +    | +    | +    | +    | +    | +    | +    | +    | +    | +    | +    | +    | +    | +    | +    | +    | -        |
| 2786546552 | GCA_002721705     | Opiritae bacterium SP241                                             | +    | +    | +    | +    | +    | +    | +    | +    | +    | +    | +    | +    | +    | +    | +    | +    | +    | +    | +    | +    | +    | +    | +    | +    | +        |
| 2786546553 | GCA_002713685     | Opiritae bacterium SAT156                                            | +    | +    | -    | +    | +    | +    | +    | +    | -    | +    | +    | +    | +    | +    | +    | +    | +    | -    | +    | +    | +    | +    | +    | +    | +        |
| 2786546554 | GCA_002730975     | Opiritae bacterium NP117                                             | +    | +    | +    | +    | +    | +    | +    | +    | +    | +    | +    | +    | -    | +    | +    | +    | +    | +    | +    | +    | +    | +    | +    | +    | -        |
| 2786546555 | GCA_002695645     | Opiritae bacterium EAC647                                            | +    | +    | +    | +    | +    | +    | +    | +    | +    | +    | +    | +    | -    | +    | +    | +    | +    | -    | +    | +    | +    | +    | +    | +    | -        |
| 2786546556 | GCA_002686835     | Opiritae bacterium ARS76                                             | -    | +    | +    | +    | +    | +    | +    | +    | +    | +    | +    | +    | +    | +    | +    | +    | +    | +    | +    | +    | +    | +    | +    | +    | -        |
| 2786546557 | GCA_002689665     | Opiritae bacterium ARS1007                                           | -    | +    | -    | +    | +    | +    | +    | +    | +    | +    | +    | +    | +    | +    | +    | +    | +    | +    | +    | +    | +    | +    | +    | +    | -        |
| 2786546558 | GCA_002692605     | Opiritae bacterium IN42                                              | +    | +    | -    | +    | +    | +    | +    | +    | +    | +    | +    | +    | +    | +    | +    | +    | +    | +    | +    | +    | +    | +    | +    | +    | -        |
| 2786546559 | GCA_002702485     | Opiritae bacterium NAT243                                            | -    | -    | -    | +    | +    | +    | +    | +    | +    | +    | +    | -    | -    | +    | +    | +    | +    | +    | +    | +    | +    | +    | +    | +    | -        |
| 2786546560 | GCA_002694035     | Opiritae bacterium IN48                                              | +    | +    | +    | +    | +    | +    | +    | +    | +    | +    | +    | +    | +    | +    | +    | +    | +    | +    | +    | +    | +    | +    | +    | +    | -        |
| 2786546561 | GCA_002692535     | Opiritae bacterium IN921                                             | +    | +    | -    | -    | +    | +    | +    | +    | +    | +    | +    | +    | +    | +    | +    | +    | +    | +    | -    | +    | +    | +    | +    | +    | -        |
| 2786546708 | GCA_002725655     | Opiritales bacterium NP990                                           | -    | +    | +    | +    | +    | +    | +    | +    | +    | +    | +    | +    | -    | +    | +    | +    | +    | -    | +    | +    | +    | +    | +    | +    | -        |
| 2786546709 | GCA_002724235     | Opiritales bacterium RS400                                           | +    | +    | +    | -    | -    | -    | -    | -    | -    | -    | -    | -    | -    | -    | -    | -    | -    | -    | -    | -    | -    | -    | -    | -    | -        |
| 2786546710 | GCA_002720915     | Opiritales bacterium SP2995                                          | +    | +    | +    | +    | +    | -    | -    | -    | -    | -    | -    | +    | +    | +    | -    | -    | -    | +    | -    | -    | -    | -    | -    | -    | -        |
| 2786546935 | GCA_002713695     | Opiritaceae bacterium SAT155                                         | +    | +    | +    | +    | +    | +    | +    | +    | +    | +    | +    | +    | +    | +    | +    | +    | +    | +    | +    | +    | +    | +    | +    | +    | +        |
| 2786546936 | GCA_002694885     | Opiritaceae bacterium EAC85                                          | +    | +    | -    | +    | +    | +    | +    | +    | +    | +    | +    | +    | +    | +    | +    | +    | +    | +    | +    | +    | +    | +    | +    | +    | +        |
| 2786546938 | GCA_002722675     | Opiritaceae bacterium SP211                                          | +    | +    | -    | +    | +    | +    | +    | +    | -    | +    | +    | +    | -    | +    | +    | +    | +    | +    | +    | -    | +    | +    | -    | +    | +        |
| 2786546939 | GCA_002717045     | Opiritaceae bacterium SP4023                                         | +    | +    | +    | +    | +    | +    | +    | +    | +    | +    | +    | +    | +    | +    | +    | +    | +    | +    | +    | -    | +    | +    | +    | +    | +        |
|            | GCA_002591725     | Candidatus Didemnitatus mandela                                      | +    | +    | +    | +    | +    | +    | +    | +    | +    | +    | +    | +    | +    | +    | +    | +    | +    | -    | +    | +    | +    | +    | +    | +    | +        |
|            | GCA_003525105     | Opiritae bacterium UBA10075                                          | +    | -    | +    | +    | +    | -    | -    | -    | -    | -    | -    | +    | +    | -    | +    | -    | -    | +    | +    | +    | +    | +    | +    | +    | -        |
|            | GCA_003482665     | Opiritaceae bacterium UBA8745                                        | +    | -    | -    | +    | +    | +    | +    | +    | -    | +    | -    | +    | -    | +    | -    | +    | -    | +    | +    | +    | +    | +    | +    | +    | -        |
|            | GCA_002420265     | Opiritales bacterium UBA5691                                         | +    | +    | +    | +    | +    | +    | +    | +    | +    | +    | +    | +    | -    | +    | -    | +    | +    | +    | +    | -    | +    | +    | +    | +    | -        |
|            | GCA_002420185     | Opiritales bacterium UBA5694                                         | +    | +    | +    | +    | +    | +    | +    | +    | +    | +    | +    | +    | +    | +    | +    | +    | +    | +    | +    | +    | +    | +    | +    | +    | -        |
|            | GCA_002450395     | Opiritales bacterium UBA6958                                         | +    | +    | +    | +    | +    | +    | +    | +    | +    | +    | +    | +    | -    | +    | +    | +    | +    | +    | +    | +    | +    | +    | +    | +    | +        |
|            | GCA_002474325     | Opiritales bacterium UBA7389                                         | +    | +    | +    | +    | +    | +    | +    | +    | +    | +    | +    | +    | +    | +    | +    | +    | +    | +    | +    | +    | +    | +    | +    | +    | -        |
|            | GCA_002367815     | Opiritaceae bacterium UBA3033                                        | +    | -    | +    | +    | +    | +    | +    | -    | +    | +    | +    | +    | +    | +    | +    | +    | +    | +    | +    | +    | +    | +    | +    | +    | -        |
|            | GCA_002471335     | Opiritaceae bacterium UBA7327                                        | +    | +    | +    | +    | +    | +    | +    | +    | +    | +    | +    | +    | +    | +    | +    | +    | +    | +    | +    | +    | +    | +    | +    | +    | -        |
|            | GCA_000019965     | Opiritus terrae PB90-1                                               | +    | +    | +    | +    | +    | +    | +    | +    | +    | +    | +    | +    | +    | +    | +    | +    | +    | +    | +    | +    | +    | +    | +    | +    | +        |
|            | GCA_000025905     | Caraliomargarita akajimensis DSM 45221                               | +    | +    | +    | +    | +    | +    | +    | +    | +    | +    | +    | +    | +    | +    | +    | +    | +    | +    | +    | +    | +    | +    | +    | +    | +        |
|            | GCA_000171235     | Geminisphaera coliterminum TAV2                                      | +    | +    | +    | +    | +    | +    | +    | +    | +    | +    | +    | +    | +    | +    | +    | +    | +    | +    | +    | +    | +    | +    | +    | +    | +        |
|            | GCA_000172555     | Pedosphaera parvula Ellin514                                         | +    | +    | +    | +    | +    | +    | +    | +    | +    | +    | +    | +    | +    | +    | +    | +    | +    | +    | +    | +    | +    | +    | +    | +    | +        |
|            | GCA_000173075     | Chthoniobacter flavus Ellin428                                       | +    | +    | +    | +    | +    | +    | +    | +    | +    | +    | +    | +    | +    | +    | +    | +    | +    | +    | +    | +    | +    | +    | +    | +    | +        |
|            | GCA_000378105     | Rubritalea marina DSM 17716                                          | +    | +    | +    | +    | +    | +    | +    | +    | +    | +    | +    | +    | +    | +    | +    | +    | +    | +    | +    | +    | +    | +    | +    | +    | +        |
|            | GCA_000972765     | Verrucomicrobia bacterium IMCC26134                                  | +    | +    | +    | +    | +    | +    | +    | +    | +    | +    | +    | +    | +    | +    | +    | +    | +    | +    | +    | +    | +    | +    | +    | +    | +        |
|            | GCA_001017655     | Kiritimiella glycovarans L21-Fru-AB                                  | +    | +    | +    | +    | +    | +    | +    | +    | +    | +    | +    | +    | +    | +    | +    | +    | +    | +    | +    | +    | +    | +    | +    | +    | +        |
|            | GCA_001438005     | Verrucomicrobia BAEL9 MAG-120507-bin52                               | +    | +    | -    | +    | +    | +    | +    | +    | +    | +    | +    | +    | +    | +    | +    | +    | +    | +    | +    | +    | +    | +    | +    | +    | +        |
|            | GCA_001580015     | Cephalotococcus primus CAG34                                         | +    | +    | +    | +    | +    | +    | +    | +    | +    | +    | +    | +    | +    | +    | +    | +    | +    | +    | +    | +    | +    | +    | +    | +    | +        |
|            | GCA_001650175     | Opiritaceae bacterium TSB47                                          | +    | +    | +    | +    | +    | +    | +    | +    | +    | +    | +    | +    | +    | +    | +    | +    | +    | +    | +    | +    | +    | +    | +    | +    | +        |
|            | GCA_001746835     | Lacunisphaera limnophila IG16b                                       | +    | +    | +    | +    | +    | +    | +    | +    | +    | +    | +    | +    | +    | +    | +    | +    | +    | +    | +    | +    | +    | +    | +    | +    | +        |
|            | GCA_000020225     | Akkermansia muciniphila ATCC BAA-835                                 | +    | +    | +    | +    | +    | +    | +    | +    | +    | +    | +    | +    | +    | +    | +    | +    | +    | +    | +    | +    | +    | +    | +    | +    | +        |
|            | GCA_000172155     | Verrucomicrobium spinosum DSM 4136                                   | +    | +    | +    | +    | +    | +    | +    | +    | +    | +    | +    | +    | +    | +    | +    | +    | +    | +    | +    | +    | +    | +    | +    | +    | +        |
|            | GCA_000526255     | Verrucomicrobium sp. LP2A                                            | +    | +    | +    | +    | +    | +    | +    | +    | +    | +    | +    | +    | +    | +    | +    | +    | +    | +    | +    | +    | +    | +    | +    | +    | +        |
|            | GCA_000953475     | Methylacidiphilum fumarolicum SolV                                   | +    | +    | +    | +    | +    | +    | +    | +    | +    | +    | +    | +    | +    | +    | +    | +    | +    | +    | +    | +    | +    | +    | +    | +    | +        |
| 2786546940 | GCA_003054665     | Albicoccus flocculans EW11                                           | -    | +    | +    | +    | +    | +    | +    | +    | +    | +    | +    | +    | -    | +    | +    | +    | +    | +    | +    | +    | +    | +    | +    | -    | +        |
|            | GCA_002455175     | Opiritaceae bacterium UBA6669                                        | -    | +    | +    | -    | -    | -    | -    | +    | +    | +    | +    | +    | -    | +    | -    | -    | +    | +    | -    | +    | -    | +    | -    | -    | -        |
|            | GCA_002344205     | Opiritaceae bacterium UBA2377                                        | -    | +    | +    | +    | +    | +    | +    | +    | +    | +    | +    | +    | -    | +    | -    | +    | +    | +    | +    | +    | +    | +    | +    | -    | +        |

| IMG ID | GenBank Accession | Taxon ID                                              | infB | lepA | pheS | rplB | rplC | rplD | rplE | rplF | rplK | rplN | rplO | rplP | rpsB | rpsC | rpsE | rpsG | rpsH | rpsI | rpsJ | rpsK | rpsL | rpsM | rpsQ | rpsS | 16S rRNA |
|--------|-------------------|-------------------------------------------------------|------|------|------|------|------|------|------|------|------|------|------|------|------|------|------|------|------|------|------|------|------|------|------|------|----------|
|        | GCA_003142615     | Fen-1467 sp003142615                                  | -    | +    | +    | +    | +    | +    | +    | +    | +    | +    | +    | +    | +    | +    | +    | +    | +    | +    | +    | +    | +    | +    | -    | +    | +        |
|        | GCA_002310495     | <i>Nibricoccus aquaticus</i>                          | -    | +    | +    | +    | +    | +    | +    | +    | +    | +    | +    | +    | +    | +    | +    | +    | +    | +    | +    | +    | +    | +    | -    | +    | +        |
|        | GCA_003096195     | <i>Ereboglobus luteus</i> Ho45                        | -    | +    | +    | +    | +    | -    | +    | +    | +    | +    | +    | +    | +    | +    | -    | +    | +    | +    | +    | +    | +    | +    | -    | +    | +        |
|        | GCA_003641745     | B12-G4 sp003641745                                    | -    | +    | +    | +    | +    | +    | +    | +    | -    | +    | +    | +    | +    | +    | +    | +    | +    | +    | +    | +    | +    | +    | -    | +    | +        |
|        | GCA_002382525     | IMCC26134 sp002382525                                 | -    | +    | +    | +    | +    | +    | +    | +    | +    | +    | +    | +    | +    | +    | +    | +    | +    | +    | +    | +    | +    | +    | -    | +    | +        |
|        | GCA_003694825     | J108 sp003694825                                      | -    | +    | +    | +    | +    | +    | +    | +    | +    | +    | +    | +    | +    | +    | +    | +    | +    | +    | +    | +    | +    | +    | -    | +    | -        |
|        | GCA_003402695     | Opi-474 sp003402695                                   | +    | +    | +    | +    | +    | +    | +    | +    | +    | +    | +    | +    | +    | +    | -    | +    | +    | +    | +    | +    | +    | +    | -    | +    | -        |
|        | GCA_003151515     | Palsa-1447 sp003151515                                | +    | +    | +    | +    | +    | +    | -    | +    | +    | +    | +    | +    | +    | +    | +    | +    | +    | +    | +    | +    | +    | +    | -    | +    | +        |
|        | GCA_002304445     | Tous-C4FEB sp002304445                                | +    | +    | +    | +    | +    | +    | +    | +    | +    | +    | +    | +    | +    | +    | -    | -    | +    | +    | +    | +    | -    | +    | -    | +    | -        |
|        | JAABVE000000000   | <i>Petrosia ficiformis</i> - associated bin0 (227c)   | -    | +    | +    | +    | +    | +    | +    | +    | +    | +    | +    | +    | +    | +    | +    | +    | +    | -    | +    | +    | +    | +    | +    | +    | +        |
|        | JAABVD000000000   | <i>Petrosia ficiformis</i> - associated bin01 (287ce) | +    | +    | +    | +    | +    | +    | +    | +    | +    | +    | +    | +    | +    | +    | +    | +    | +    | -    | +    | +    | +    | +    | +    | +    | +        |
|        | GCA_014529625.1   | Strain F3                                             | +    | +    | +    | +    | +    | +    | +    | +    | +    | +    | +    | +    | +    | +    | -    | +    | +    | +    | +    | +    | +    | +    | +    | +    | +        |
|        | GCA_014529675.1   | Strain E3                                             | +    | +    | +    | +    | +    | +    | +    | +    | +    | +    | +    | +    | +    | +    | +    | +    | +    | +    | +    | +    | +    | +    | +    | +    | +        |
|        | GCA_014529665.1   | Strain A3                                             | +    | +    | +    | +    | +    | +    | +    | +    | +    | +    | +    | +    | +    | +    | +    | +    | +    | +    | +    | +    | +    | +    | +    | +    | +        |
