# Supplementary material for: Discovery of an Antarctic Ascidian-Associated Uncultivated Verrucomicrobia with Antimelanoma Palmerolide Biosynthetic Potential
Source: PubMed Central journal article supplement (PMC8636102; doi:10.1128/msphere.00759-21), 2021-12-01
Supplement: msphere.00759-21-t0001.pdf [file msphere.00759-21-t0001.pdf]

1 **Text S1**

2  
3 **Materials and Methods**

4  
5 **Sample collections.** *Synoicum adareanum* lobe samples selected for metagenome sequencing  
6 were collected by SCUBA and stored frozen in a buffer (50 mM Tris-HCl at pH 8.0, 50 mM  
7 EDTA pH 8.0, 15% sucrose; (1)) at -80 °C until DNA extraction. Samples (Nor-2a-2007 and  
8 Nor-2c-2007) were collected from Norsel Point (S 64° 45.638', W 64° 05.874') on 3 May 2007  
9 at a depth of 29 m. Samples Bon1c-2011 and Del2b-2011 were also collected by SCUBA (2)  
10 from Bonaparte Point (24 Mar 2011 at 26.2 m) and Delaca Island (28 Mar 2011 at 22 m) and  
11 stored frozen (-80 °C) until DNA extraction (see (3) for further sample details).

12  
13 **Sample processing and high molecular weight DNA extraction.** For Nor2a-2007 and Nor2c-  
14 2007 the outer tissue layer was removed using a scalpel, then ~2.5-gram tissue sections were  
15 manually homogenized (1 min.) using a sterile mortar (ice-cold) with a pestle in sterile seawater  
16 (12 mL). The cell suspension was sieved through 63 mm sterile Nitex mesh to remove large  
17 debris then transferred to a sterile 25 mL Oakridge tube (Nalgene) for centrifugation (300 x g, 15  
18 min at 4 °C) to pellet large cells and debris. The supernatant was then centrifuged at 8000 x g to  
19 pellet the bacterial cells at 4 °C. The pellet was resuspended in 200 mL of buffer (50 mM Tris-  
20 HCl at pH 8.0, 50 mM EDTA (pH 8.0, 15% sucrose; (1)).

21 DNA was extracted using the Qiagen Blood and Tissue Kit (Qiagen, Inc.) following  
22 manufacturer's instructions. The gDNA was screened by PCR to verify low levels of host  
23 (eukaryote) contamination using primers 960F (GGC TTA ATT TGA CTC AAC RCG) and  
24 1200R (5' GGG CAT CAC AGA CCT G 3';(4)). Ketosynthase gene amplification was  
25 confirmed in these gDNA extracts following Riesenfeld et al. (5).

26 Samples Bon-1c-2011 and Del-2b-2011 were collected and homogenized as described by (3),  
27 except larger sample sizes were used such that 2.35 and 2.15 grams of tissue (respectively) was  
28 homogenized using a MiniLys (Bertin-Instruments, Montigny-le-Bretonneux, France) in a 7 mL  
29 tube with 3 mL sterile NaCl (3.5%). High molecular weight gDNA extracted from cell  
30 preparations followed Massana et al., (1). Care was taken to preserve the high molecular weight  
31 nature of the material e.g., large bore pipet tips, Pasteur pipets used for organic extractions and  
32 HMW gDNA pellet was rehydrated at 2 °C overnight gently shaking following ethanol  
33 precipitation. These extracts were reprecipitated in 3M NaCl and ethanol (200 proof). Extracts  
34 were checked on 0.7 % agarose gels and quantified using a ND-1000 Nanodrop  
35 spectrophotometer (Thermo Fisher Scientific, Waltham MA). Subsamples from these same lobes  
36 were used for amplicon sequencing (Illumina Inc., San Diego, CA) of the variable 4-5 region of  
37 the rRNA gene (3).

38  
39 **454 and Proton metagenome sequencing.** 454 pyrosequencing (performed at the Roy J Carver  
40 Biotechnology Center, University of Illinois at Urbana-Champaign) was conducted with a  
41 bacterial enriched metagenomic DNA preparation from *S. adareanum* lobe (Nor-2c-2007). The  
42 MiniLys metagenomic DNA was used to generate single-stranded DNA libraries and emulsion  
43 PCR according to established protocols (454 Life Sciences, Roche). Amplified library fragments  
44 were sequenced on a Roche Genome Sequencer FLX system initially with a titration sequencing  
45 run, followed by a full plate run. Next, an Ion Proton System (Ion Torrent; run at the Nevada

46 Genomics Center following manufacturer's library preparation and sequencing protocols) was  
47 used to sequence a metagenomic DNA sample prepared from *S. adareanum* lobe Nor-2a-2007.  
48 See materials and methods in the main manuscript for CoAssembly1 details.  
49

50 **Pacific Biosciences sample preparation and metagenome sequencing details.** DNA quality  
51 control for samples Bon1c-2011 and Del2b-2011 was confirmed with Qubit Fluorometer  
52 (Invitrogen, Inc., Carlsbad CA), NanoDrop 1000 and pulsed field gel electrophoresis (PFGE;  
53 BioRad, Hercules, CA). To note, although high molecular weight quality was confirmed on the  
54 PFGE, the NanoDrop ratios of 260:230 ratios were 1.2-1.4, much lower than 1.8 which is  
55 recommended by Pacific Biosciences (PB; San Diego, CA). The 260/280 ratio improved  
56 significantly after two rounds of purification with AMPure® PB beads (initial step in the PB  
57 SMRTbell protocol), the 260/230 ratio remained low. gDNA was sheared in G-Tubes (Covaris,  
58 Woburn, MA) and purified with 0.45x volume of AMPure PB beads. SMRTbell (PacBio)  
59 libraries were prepared according to the PacBio protocol specified in "Procedure and Checklist-  
60 Preparing gDNA Libraries Using the SMRTbell Express Template Preparation Kit 2.0". The  
61 removal of single-strand overhangs was followed by DNA damage repair reaction, end repair/A-  
62 tailing reaction and overhang SMRTbell adapter ligation, with all the steps performed  
63 subsequently in one tube. After 0.45x volume AMPure PB purification Bon-1c-2011 and Del-2b-  
64 2011 SMRTbell libraries were size selected on Blue Pippin instrument with 6 Kbp and 5 Kbp  
65 lower cutoff respectively. Sequencing primer 4 was annealed and DNA polymerase 3.0 was  
66 bound to the templates. The libraries were sequenced on a Sequel (PB) with sequencing  
67 chemistry 3.0 and 10 or 20hr movies A total of 2 SMRT cells were sequenced for Bon-1c-2011  
68 with a total data output of 23.7 Gb. A total of 4 SMRT cells were sequenced for Del-2b-2011  
69 with a total data output of 4.3 Gb. We obtained 48,298 and 9,576 CCS reads from Bon-1C-2011  
70 and Del-2B-2011, respectively. The average read length was 11,870 bp for Bon-1C-2011 and  
71 10,491 bp for Del-2B-2011 CCS reads.  
72

73 **Binning and bin taxonomic and functional classification.** We initially used MaxBin (6) to bin  
74 CoAssembly 1 based on the coverage depth, tetranucleotide frequencies and single-copy marker  
75 genes, which resulted in 20 "genome"-like bins, containing 63,218 contigs (73.2% of the  
76 assembly). CheckM (7) v1.0.11 was used to estimate the genome completeness and potential  
77 contamination based on conserved marker genes and perform taxonomic evaluation of the  
78 CoAssembly 1 bins using similarity of genomic characteristics, and proximity within a reference  
79 genome tree. GTDB-Tk v0.1.3 was also used to evaluate the binned contigs with respect to  
80 taxonomic classifications, based on alignment of concatenated marker genes and maximum-  
81 likelihood placement within a reference tree, its relative evolutionary divergence, and ANI to  
82 reference genomes from GTDB taxonomy database (8).

83 Initial binning of CoAssembly 1 resulted in 3 bins of interest (Table S3 in which the putative  
84 BGC contigs (Fig. 1) that were found in two taxonomically unresolved bins (Bin 1 and Bin 2)  
85 dominated by short contigs encoding mostly hypothetical genes with no taxonomic affiliation.  
86 Then a third bin was identified (Bin 4, 27 contigs, 143 Kbp) with several contigs attributable to  
87 Opitutales, and many additional unclassified contigs. Despite additional re-assemblies, we were  
88 not able to link the BGC with these Opitutales scaffolds, thus motivating another round of  
89 metagenome sequencing using Pacific Biosciences Sequel Systems technology (PacBio).

90 CoAssembly 2 contigs were binned using MaxBin2 (9). The bin quality was assessed using  
91 CheckM v1.1.2, and GTDB-Tk v1.0.2, and then was used for taxonomic classification of the bins

92 as above. We implemented a bin-cleaning strategy prior to functional classification of the  
93 *Opitutaceae* bin 8 sequence to reduce errors in classification and assessment of functional  
94 properties contributed by contaminating contigs which were evident upon visualization tools  
95 provided by MetaERG. This strategy takes a conservative approach (i.e., there is some chance  
96 that contigs that were true *Verrucomicrobia* contigs were discarded), however we felt this was  
97 the most robust approach. Examination of those ORFs in contigs discarded suggested 5 out of 24  
98 were classified as having some percentage of ORF assigned to an *Opitutaceae* genus. First, we  
99 used the GTDB-assigned taxonomy as the basis for classification. Next, a custom script was  
100 developed to screen contigs in bin 8 with a majority rules algorithm to retain them in the bin if  
101 the majority of ORFs on a given contig were assigned to the classified taxonomy. All contigs  
102 with the verified identity were placed in the “cleaned” bin (Table S3). The cleaned bin was then  
103 run through CheckM v1.1.2 and GTDB-Tk v1.3.0 (10) to evaluate the efficacy of the cleaning  
104 algorithm. This effort reduced contamination in the bin, yet retained a similar level of markers  
105 identified for *Verrucomicrobia*. Following manual assembly of the *Opitutaceae* genome, a re-run  
106 with CheckM suggested a number of markers were still absent, these were identified however,  
107 through inspection of the MetaERG annotation. Thus, nearly all markers were identified,  
108 resulting in a CheckM completeness estimate of 96.04 %. This may have been the result of poor  
109 representation of *Verrucomicrobia* genomes in the CheckM database (12 genomes in the 2015  
110 database that is currently being updated) when doing orthologous searches. When classified  
111 using GTDB-Tk the results suggested the closest affiliate was an *Opitutaceae* MAG UBA6669  
112 (the only genome in this un-named genus) – however the result was based on a low average  
113 nucleotide identity (75.26) with this medium quality MAG and a low GTDB-Tk alignment  
114 fraction (AF) score of 0.02 (calculated as sum of lengths of bidirectional best hits divided by sum  
115 of lengths of all genes in each genome separately; AF being most valuable only when  
116 circumscribing species).

117  
118 **Real Time PCR.** Primer 3 (11), plugin to Geneious (Auckland, NZ) was used to design primers  
119 to three coding regions along the candidate palmerolide A BGC (non-ribosomal peptide  
120 synthase, acyltransferase, and 3-hydroxymethylglutaryl coenzyme A synthase; amplicon size of  
121 120 bases ea.) for real time PCR following design and optimization criteria recommended by  
122 (12). Homology of the primers to sequences other than their targets was evaluated by BLAST to  
123 the metagenome assembly. A single GBlocks synthetic positive control was designed with all  
124 three gene targets (Integrated DNA Technologies, IDT, Coralville, IA, USA). The GBlocks  
125 control also included a 120 base control region matching a putative luciferase CDS (in the  
126 putative BGC) that was not used for quantitative assays (Table S5).

127 As described in the main text, a *S. adareanum* DNA sample set (n=63 *S. adareanum* lobes  
128 from 21 colonies) with high levels of palmerolide A were screened with the real time PCR Real  
129 time PCR assays on a Quant Studio 3 (Thermo Fisher Scientific, Inc.) at the Nevada Genomics  
130 Center. Reactions (15 mL) were run with Power SYBR® Green PCR Master Mix (Applied  
131 Biosystems, Thermo Fisher Scientific), following the manufacturer’s protocol and thermal  
132 cycling conditions (Initial hold at 95 C for 10 minutes followed by 40 cycles of denaturation at  
133 95 °C for 15 sec, and anneal/extension at 60 °C for 1 min. This annealing temperature was  
134 confirmed to produce optimal results for the three gene targets at a primer concentration of 0.3  
135 M. Results were analyzed using QuantStudio™ Design and Analysis Software v1.4.3 (Thermo  
136 Fisher Scientific) in which gene target copy numbers per ng of DNA template were estimated  
137 from standard curves of the synthetic positive control. All reactions had high efficiencies (ave.

138 99.54, 1.31 s.d., n=13) and  $r^2$  (ave. 0.997, 0.004 s.d., n=13). Pearson correlation coefficients  
139 were determined (Microsoft® Excel for Mac v. 16.16.24), then for gene target levels compared  
140 to palmerolide A concentrations determined by LC-MS and 16S rRNA gene (variable region 3-  
141 4) amplicon sequence variant occurrence levels reported in Murray et al. (3), and the data was  
142 plotted using SigmaPlot (v. 14; Systat, San Jose, CA, USA).

143  
144 **Manual MAG assembly and annotation.** A manual approach was implemented to arrive at  
145 assembly of the *Opitutaceae* MAG of interest. Four bins from different assemblies of the CCS  
146 reads, that had 58% GC content (targeted GC percentage of the palmerolide A BGC), were  
147 assembled with phrap (overlap based assembler; (13, 14)) and the assembly was visualized with  
148 Consed (15). The CCS reads were used to close gaps and verify repetitive elements. A total of  
149 ten contigs were resolved, five of which corresponded to sequences that were similar to one  
150 another suggesting they were a form of repeated elements within the genome. Rigorous  
151 assessment of these repetitive elements, including linking each contig end to other contigs with  
152 read-pairing information, assessing estimated gap lengths, and reviewing read coverage along the  
153 contigs, strongly suggest that the ten contigs represent the complete genome where each of the  
154 five largely unique contig was flanked by contigs corresponding to the repeated elements.

155 The nature of the five repeated elements that encompass the palmerolide BGC (outlined in  
156 Fig. 1) is fully supported by read depth of coverage analysis (e.g., the portions of the palmerolide  
157 BGC that are inferred to be present in five copies have 5X the fold coverage of the unique  
158 sections of the genome). Due to the very large length of the repeated elements (36.1-73.9 Kbp),  
159 no long reads were identified that spanned the entire length of the repeated regions or sufficient  
160 amounts that would allow us to specifically order the ten contigs into a single scaffold. A visual  
161 representation of the genome in circular format was prepared in GCView (16) in which the five  
162 unique contigs, and one possible ordering of the palmerolide BGC repeats is displayed. We used  
163 MetaERG (17) and NCBI's PGAP pipeline upon MAG submission (18) as annotation pipelines  
164 for analysis of the palmerolide A-containing MAG.

165  
166 **Phylogenomic analyses.** We targeted genomes associated with marine and host-associated  
167 habitats in the *Opitutaceae* family in addition to including representatives of all *Opitutaceae*  
168 genera represented in the GTDB (release 05-RS95). The 115 reference datasets were  
169 downloaded from the NCBI and JGI IMG databases. The genome sequences were annotated by  
170 Prokka v1.14.5 (19) which performed the open reading frame (ORF) calls and scanned the  
171 protein and domain databases in a hierarchical manner from the translated peptide sequences (see  
172 Table S6 for list of shared ribosomal proteins and rRNA genes).

173 Among 115 reference datasets, 62 (many assembled metagenomes and single cell genomes)  
174 included 16S rRNA sequences that were identified in the Prokka annotation result. Of these, 47  
175 were unique 16S rRNA sequences without duplication (same genome multiple copy, or identical  
176 sequences). The *Opitutaceae* bin 8 (and assembled *Ca. S. palmerolidicus* genome) also included  
177 a 16S rRNA identified from the assembled genome. We added the previously sequenced 16S  
178 rRNA (FJ169192) and performed the multiple sequence by MUSCLE v3.8.31 (20) and resulting  
179 in 49 16S rRNA sequences with 1,636 aligned positions. A maximum likelihood tree was  
180 constructed using RAxML v.8.2.12 under the GTRCAT model of evolution and with the number  
181 of bootstraps automatically determined (MRE-based bootstopping criterion). A total of 250  
182 bootstrap replicates were conducted under the rapid bootstrapping algorithm, with 100 sampled

183 to generate proportional support values. The final tree is rooted by *Kiritimatiella glycovorans*  
184 L21-Fru-AB and displayed in MegaX (21).

185 There were 16 ribosomal proteins (*rplB*, *C*, *D*, *E*, *F*, *N*, *O*, *P*, and *rpsC*, *H*, *J*, *K*, *L*, *Q*, *M*, *S*)  
186 identified shared among 48 reference datasets. Each individual gene set was aligned using  
187 MUSCLE. The 16 alignments were concatenated, forming a final alignment comprising 48  
188 genomes and 3,035 amino-acid positions. A maximum likelihood tree was constructed using  
189 RAxML v.8.2.12 (22) under the LG plus gamma model of evolution (PROTGAMMALG in the  
190 RAxML model section), and with the number of bootstraps automatically determined (MRE-  
191 based bootstrapping criterion). A total of 150 bootstrap replicates were conducted under the rapid  
192 bootstrapping algorithm, with 100 sampled to generate proportional support values. The final  
193 tree is rooted by *Kiritimatiella glycovorans* L21-Fru-AB, a distinct phylum-level lineage  
194 originally designated *Verrucomicrobia* (23) and displayed in MegaX.

195

## 196 References

197

- 198 1. Massana R, Taylor LT, Murray AE, Wu KY, Jeffrey WH, DeLong EF. 1998. Vertical  
199 distribution and temporal variation of marine planktonic archaea in the Gerlache Strait,  
200 Antarctica, during early spring. *Limnol Oceanogr* 43:607-617.
- 201 2. Baker BJ, Dent B. 2020. *Synoicum adareanum* sampling underwater video March 2011  
202 Palmer Station Antarctica, V3. <https://doi.org/10.5061/dryad.gxd2547gw>  
203 doi:<https://doi.org/10.5061/dryad.gxd2547gw>, Dryad Data.
- 204 3. Murray AE, Avalon NE, Bishop L, Davenport KW, Delage E, Dichosa AEK, Eveillard  
205 D, Higham ML, Kokkaliari S, Lo C-C, Riesenfeld CS, Young RM, Chain PSG, Baker BJ.  
206 2020. Uncovering the core microbiome and distributions of palmerolide in *Synoicum*  
207 *adareanum* across the Anvers Island archipelago, Antarctica. *Mar Drugs* 18:298.
- 208 4. Gast RJ, Dennett MR, Caron DA. 2004. Characterization of protistan assemblages in the  
209 Ross Sea, Antarctica by denaturing gradient gel electrophoresis. *Appl Environ Microbiol*  
210 70:2028-2037.
- 211 5. Riesenfeld CS, Murray AE, Baker BJ. 2008. Characterization of the microbial  
212 community and polyketide biosynthetic potential in the palmerolide-producing tunicate,  
213 *Synoicum adareanum*. *J Nat Prod* 71:1812-1818.
- 214 6. Wu YW, Tang YH, Tringe SG, Simmons BA, Singer SW. 2014. MaxBin: an automated  
215 binning method to recover individual genomes from metagenomes using an expectation-  
216 maximization algorithm. *Microbiome* 2:26.
- 217 7. Parks DH, Imelfort M, Skennerton CT, Hugenholtz P, Tyson GW. 2015. CheckM:  
218 assessing the quality of microbial genomes recovered from isolates, single cells, and  
219 metagenomes. *Genome Res* 25:1043-1055.
- 220 8. Parks D, Chuvochina M, Waite D, Rinke C, Sharshewski A, Chumeil P-A, Hugenholtz P.  
221 2018. A standardized bacterial taxonomy based on genome phylogeny substantially  
222 revises the tree of life. *Nat Biotechnol* 36:996-1004.
- 223 9. Wu YW, Simmons BA, Singer SW. 2016. MaxBin 2.0: an automated binning algorithm  
224 to recover genomes from multiple metagenomic datasets. *Bioinformatics* 32:605-607.
- 225 10. Chaumeil P-A, Mussig A, Hugenholtz P, Parks D. 2020. GTDB-Tk: a toolkit to classify  
226 genomes with the Genome Taxonomy Database. *Bioinformatics* 36:1925-1927.
- 227 11. Untergasser A, Cutcutache I, Koressaar T, Ye J, Faircloth BC, Remm M, Rozen SG.  
228 2012. Primer3-new capabilities and interfaces. *Nuc Acids Res* 40:e115.

- 229 12. Bustin S, Huggett J. 2017. qPCR primer design revisited. *Biomolecul Detect Quant*  
230 14:19-28.
- 231 13. Ewing B, Green P. 1998. Base-calling of automated sequencer traces using phred. II.  
232 Error probabilities. *Genome Res* 8:186-194.
- 233 14. Ewing B, Hillier L, Wendl MC, Green P. 1998. Base-calling of automated sequencer  
234 traces using phred. I. Accuracy assessment. *Genome Res* 8:175-185.
- 235 15. Gordon D, Abajian C, Green P. 1998. Consed: A graphical tool for sequence finishing.  
236 *Genome Res* 8:195-202.
- 237 16. Stothard P, Wishart D. 2005. Circular genome visualization and exploration using  
238 GCView. *Bioinformatics* 21:537-539.
- 239 17. Dong XL, Strous M. 2019. An integrated pipeline for annotation and visualization of  
240 metagenomic contigs. *Front Genetics* 10:999.
- 241 18. Tatusova T, DiCuccio M, Badretdin A, Chetvernin V, Nawrocki EP, Zaslavsky L,  
242 Lomsadze A, Pruitt K, Borodovsky M, Ostell J. 2016. NCBI prokaryotic genome  
243 annotation pipeline. *Nuc Acids Res* 44:6614-6624.
- 244 19. Seemann T. 2014. Prokka: rapid prokaryotic genome annotation. *Bioinformatics*  
245 30:2068-2069.
- 246 20. Edgar RC. 2004. MUSCLE: multiple sequence alignment with high accuracy and high  
247 throughput. *Nuc Acids Res* 32:1792-1797.
- 248 21. Stecher G, Tamura K, Kumar S. 2020. Molecular Evolutionary Genetics Analysis  
249 (MEGA) for macOS. *Mol Biol Evol* 37:1237-1239.
- 250 22. Stamatakis A. 2006. RAxML-VI-HPC: maximum likelihood-based phylogenetic analyses  
251 with thousands of taxa and mixed models. *Bioinformatics* 22:2688-2690.
- 252 23. Spring S, Bunk B, Sproer C, Schumann P, Rhode M, Tindall BJ, Klenk H-P. 2016.  
253 Characterization of the first cultured representative of Verrucomicrobia subdivision 5  
254 indicates the proposal of a novel phylum. *ISME J* 10:2801-2816.
